# Supplementary material for: Female-to-male sex reversal in mice caused by transgenic overexpression of Dmrt1
Source: Oxford University Press journal article supplement (doi:10.1242/dev.122184), 2015-01-01
Supplement: dev122184supp.pdf [file dev122184supp.pdf]

## Supplementary Material

### Supplementary Figures

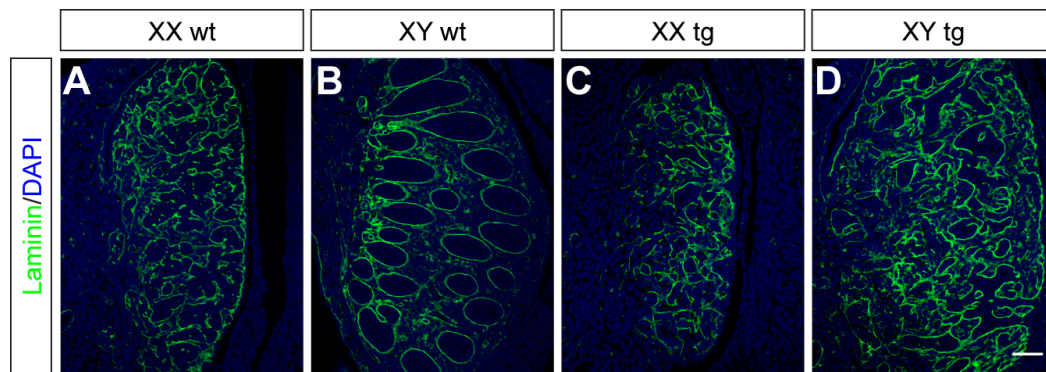

**Fig. S1. Lack of cord formation in XX/XY fetal gonads expressing the *Dmrt1* transgene.**

(A-D) Immunofluorescence staining for laminin (green) on sagittal sections of fetal gonads at 14.5 dpc. Testis cords were observed in wild type testes but not in XX or XY testes transgenic for *Dmrt1*. Nuclei were counterstained with DAPI (blue). Scale bar, 50  $\mu$ m.

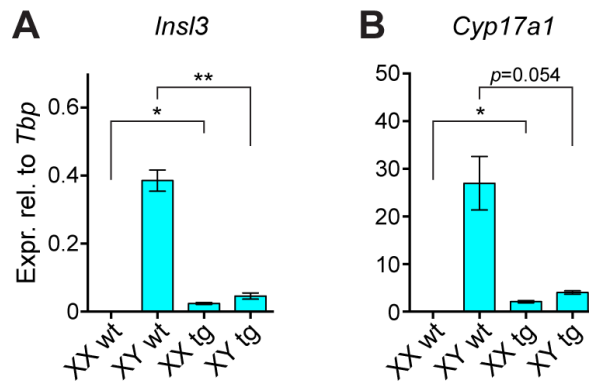

**Fig. S2. Quantitative gene expression analyses of steroidogenic marker genes in fetal mouse gonads at 14.5 dpc using qRT-PCR.**

(A-B) Both *Insl3* and *Cyp17a1* were up-regulated in XX transgenic gonads, compared with XX wild-type ovaries. Mean  $\pm$  s.e.m.,  $n=3$ . Statistical significance was determined for two-way comparisons indicated by brackets. \*,  $p < 0.05$ ; \*\*,  $p < 0.01$ : Student's *t* test.

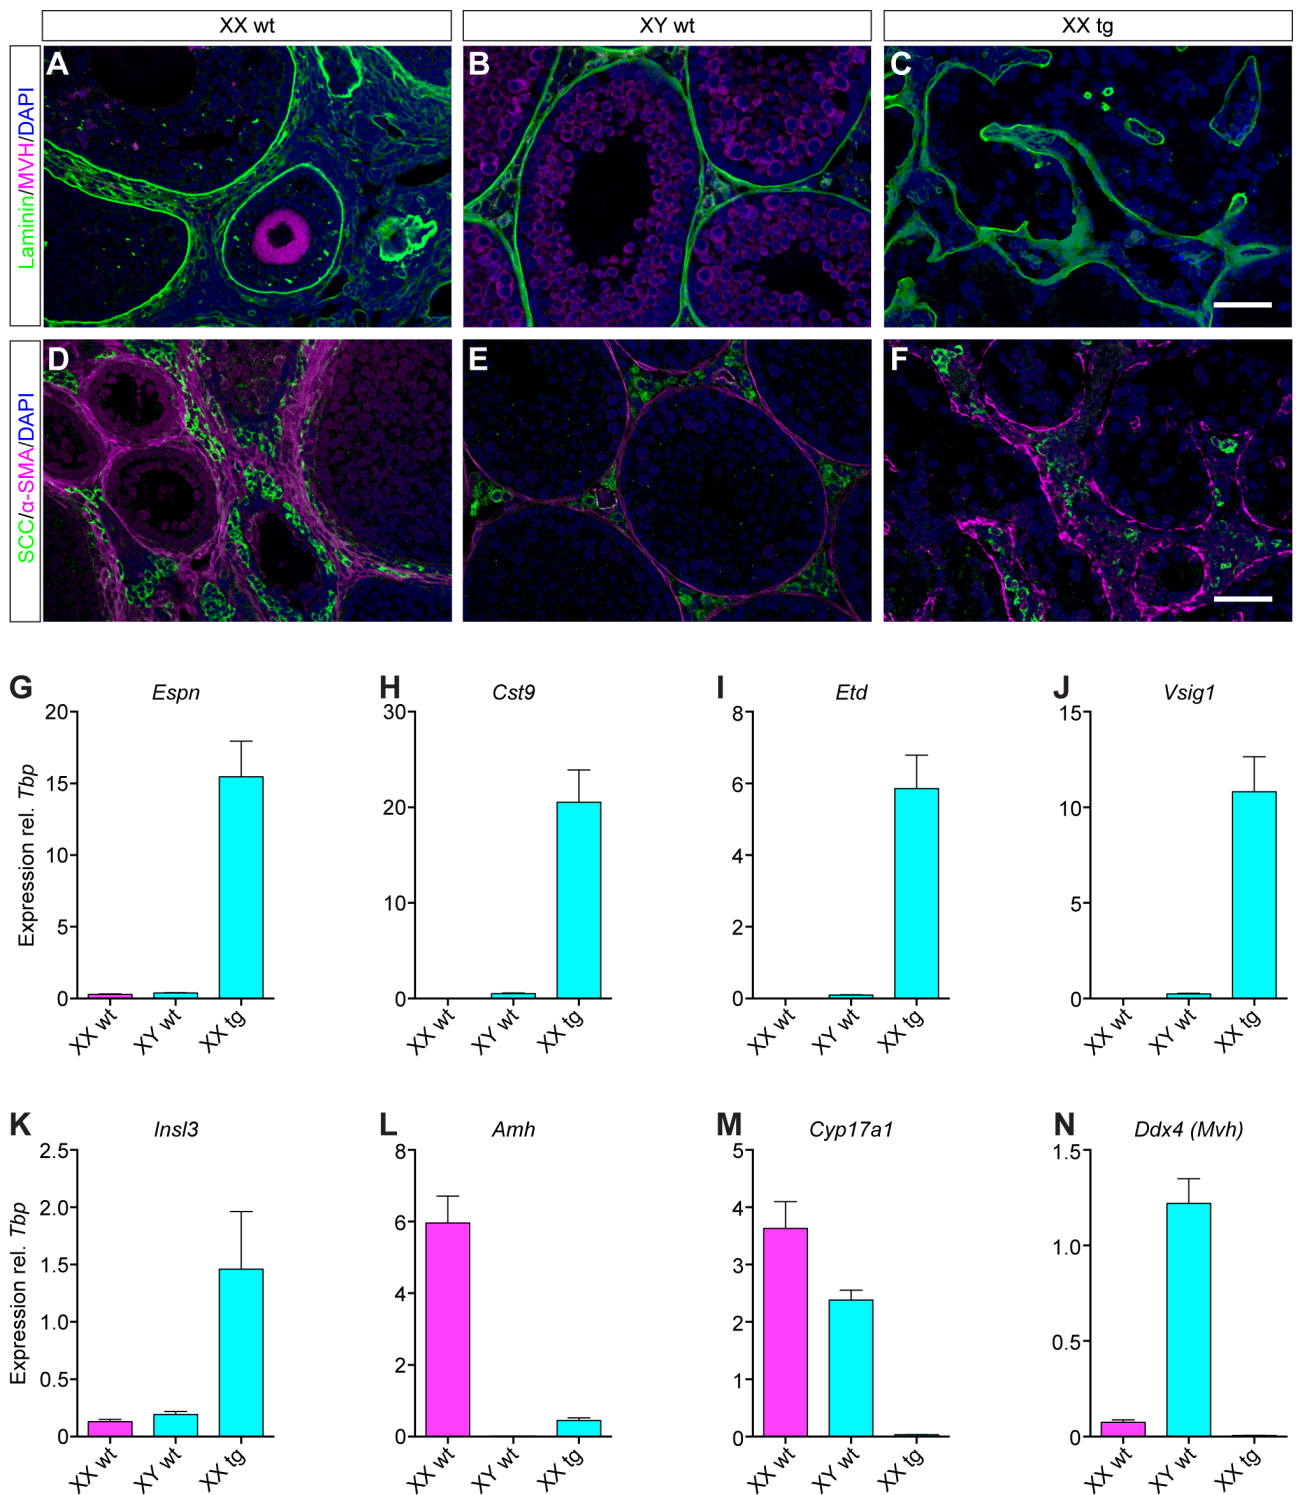

**Fig. S3. Expression analyses of marker genes in adult mouse gonads.**

(A-F) Immunofluorescence analyses of sections of adult mouse gonads at 4 weeks. Sertoli cell clusters in sex-reversed transgenic testes (C) were outlined by laminin (green), a marker for basal

membrane. These resembled neither ovarian follicles (A) nor testis cords (B). Germ cells (marked by MVH, magenta) were absent in XX transgenic testes. (D-F) In the wild type (E) and transgenic testes (F), interstitial Leydig cells stained positive for SCC, whereas in wild type ovaries, theca cells surrounding the follicles were positive for SCC (D). Sections were also analysed for alpha-smooth muscle actin ( $\alpha$ -SMA); staining for  $\alpha$ -SMA in combination with flattened cell morphology marks peritubular myoid cells. Scale bar, 50  $\mu$ m. (G-N) Quantitative gene expression analyses in adult gonads at 4 weeks using qRT-PCR. Pink bars represent phenotypic female samples and blue bars phenotypic male samples, mean  $\pm$  s.e.m. of three technical replicates.

## Supplementary Materials and Methods

### Genotyping

Genomic DNA was extracted from mouse tissue using QuickExtract solution (Epicentre). Genotyping PCRs were performed using GoTaq (Promega) to determine genetic sex and presence of the transgene. Sexing primers were as described (McFarlane et al., 2013). Primers (5'-3') for the *Wt1:Dmrt1*-IRES-EGFP transgene were 5'Wt1-F (GTGCGTCCAGCAGCCGGAGCAA) and Dmrt1-R (ATCAGGCTGCACTTCTTGCCTG).

### qRT-PCR

qRT-PCR analyses were performed as described (Zhao et al., 2014). Expression was normalized to *Tbp* (Svingen et al., 2009) or *Ddx4* in the cases of *Nanos2* and *Dnmt3l*. Statistical analyses were performed using a two-tailed Student's *t* test. Primers or TaqMan probes (Life Tech) used are listed in Table S1.

**Table S1. Primers and probes**

| <b>Primer</b> | <b>Sequence or TaqMan probe ID</b> |
|---------------|------------------------------------|
| Tbp.F         | ACGGACAACCTGCGTTGATTTT             |
| Tbp.R         | GAAGGGAGGAGGGGTGAG                 |
| Sox9.F        | AGTACCCGCATCTGCACAAC               |
| Sox9.R        | TACTTGTAATCGGGGTGGTCT              |
| Dmrt1.F       | CCTACTCAGAAGCCAAAGCCAGTG           |
| Dmrt1.R       | CCGAGGACGCAGACTCACATTC             |
| Sox8.F        | GCAAGACCCTAGGCAAGCTGT              |
| Sox8.R        | TCTGGGTGGTCTTTCTTGTGC              |
| Sox10.F       | CAAGGAGGGGCTGCTGCTAT               |
| Sox10.R       | ATGGCTCTGGCCTGAGGGGT               |
| Amh.F         | CGAGCTCTTGCTGAAGTTCCA              |
| Amh.R         | GAAGTCCACGGTTAGCACCAA              |
| Wt1.F         | CGGTCCGACCATCTGAAGAC               |
| Wt1.R         | GTTGTGATGGCGGACCAATT               |
| Ptdgs.F       | GCTCTTCGCATGCTGTGGAT               |

|           |                             |
|-----------|-----------------------------|
| Ptdgs.R   | GCCCCAGGAACTTGTCTTGTT       |
| Dhh.F     | CCCGACATAATCTTCAAGGATGA     |
| Dhh.R     | GCGATGGCTAGAGCGTTCAC        |
| Cyp26b1.F | TGGACTGTGTCATCAAGGAGGT      |
| Cyp26b1.R | GTCGTGAGTGTCTCGGATGCTA      |
| Star.F    | AAACTCACTTGGCTGCTCAGTATTGAC |
| Star.R    | CAGGTGGTTGGCGAACTCTATCTG    |
| Insl3.F   | TCCTCGGCAGGCTTCTCAGC        |
| Insl3.R   | GCTCCTTCAGTGGGGACACAGAC     |
| Cyp11a1.F | CAGTGATGACCTATTCCGCTTTTCC   |
| Cyp11a1.R | TCTGGTAGACAGCATTGATGAACCG   |
| Hsd3b.F   | GGACAAAGTATTCCGACCAGAAACC   |
| Hsd3b.R   | CAGCAGTGTGGATGACAACAGAGATG  |
| Cyp17a1.F | CATCCCACACAAGGCTAACA        |
| Cyp17a1.R | CAGTGCCCAGAGATTGATGA        |
| Hsd17b1.F | TGTTGCGCTAGCTTCTGACC        |
| Hsd17b1.R | AGCAGCCACAGATTTGGAGT        |
| Hsd17b3.F | ATGGCATCGGGAAAGCCTAT        |
| Hsd17b3.R | CTCTTCTGCAATGGTCTGTAGC      |
| Foxl2.F   | AGGGAGAGAATAAAACATTCATGG    |
| Foxl2.R   | GCAAACCTCCAAGGCCATTAC       |
| Wnt4.F    | CTGGACTCCCTCCCTGTCTTT       |
| Wnt4.R    | CATGCCCTTGTCACTGCAA         |
| Rspo1.F   | CGACATGAACAAATGCATCA        |
| Rspo1.R   | CTCCTGACACTTGGTGCAGA        |
| Fst.F     | GCAGCCGGAAGTAGAAGTACA       |
| Fst.R     | ACACAGTAGGCATTATTGGTCTG     |
| Stra8.F   | TTCAGCTCTACATACAGATCATTGAG  |
| Stra8.R   | ATCTGGGGGCTCTGGTTC          |
| Sycp3.F   | AAATCTGGGAAGCCACCTTTGG      |
| Sycp3.R   | TGGAGCCTTTTCATCAGCAACATC    |
| Cyp19a1.F | CCTGGACGAAAGTGCTATTGTGAAG   |
| Cyp19a1.R | GAAGATGTTTGGTTTGTGAGGAGAGC  |
| Ddx4.F    | CAGGAATGCCATCAAAGGAACAAC    |
| Ddx4.R    | CCCAACAGCGACAAACAAGTAACTG   |
| Espn.F    | TTACATGCAGACCAAGAACAAGCT    |
| Espn.R    | CCACCTTGGGCTCCTTGAG         |
| Cst9.F    | TGAATATGCCTACAGGATGGAA      |
| Cst9.R    | CATGGAATACACGGTTGGAA        |

|         |                            |
|---------|----------------------------|
| Etd.F   | CTTCTCTCACCGCACAAACAA      |
| Etd.R   | CTCAAGGCAATGGAGAAAGC       |
| Vsig1.F | GGTGTTCATTTTGGGAAGG        |
| Vsig1.R | TGAAAGCTTTTCCAGGGACT       |
| Ddx4    | TaqMan probe Mm00802445_m1 |
| Nanos2  | TaqMan probe Mm02525720_s1 |
| Dnmt3l  | TaqMan probe Mm00457635_m1 |

## Immunofluorescence

Immunofluorescence staining was performed on paraffin sections of mouse embryos or adult gonads. Antibodies and dilutions are listed in Table S2.

**Table S2. Antibodies**

| Antibody                  | Source/Reference                      | Dilution |
|---------------------------|---------------------------------------|----------|
| Goat anti-GFP             | Abcam (Ab5450)                        | 1:500    |
| Mouse anti-SOX9           | Abnova (H00006662-M01)                | 1:200    |
| Rabbit anti-FOXL2         | Polanco et al. (Polanco et al., 2010) | 1:500    |
| Rabbit anti-DMRT1         | Santa Cruz (H-240; SC-98341)          | 1:100    |
| Rabbit anti-MVH           | Abcam (Ab13840)                       | 1:800    |
| Mouse anti-MVH            | Abcam (ab27591)                       | 1:500    |
| Goat anti-AMH             | Santa Cruz (C-20; SC-6886)            | 1:300    |
| Rabbit anti-HSD3 $\beta$  | Transgenic Inc (KAL-KO607)            | 1:500    |
| Mouse anti-SCP3           | Abcam (ab97672)                       | 1:200    |
| Rabbit anti-Laminin       | Sigma (L9393)                         | 1:200    |
| Mouse anti- $\alpha$ -SMA | Sigma (A2547)                         | 1:200    |
| Rabbit anti-SCC           | Svingen et al. (Svingen et al., 2012) | 1:300    |

## Supplementary References

**McFarlane, L., Truong, V., Palmer, J. S. and Wilhelm, D.** (2013). Novel PCR assay for determining the genetic sex of mice. *Sex. Dev.* **7**, 207-211.

**Polanco, J. C., Wilhelm, D., Davidson, T.-L., Knight, D. and Koopman, P.** (2010). Sox10 gain-of-function causes XX sex reversal in mice: implications for human 22q-linked disorders of sex development. *Hum. Mol. Genet.* **19**, 506-516.

**Svingen, T., François, M., Wilhelm, D. and Koopman, P.** (2012). Three-dimensional imaging of Prox1-EGFP transgenic mouse gonads reveals divergent modes of lymphangiogenesis in the testis and ovary. *PLoS ONE* **7**, e52620.

**Svingen, T., Spiller, C. M., Kashimada, K., Harley, V. R. and Koopman, P.** (2009). Identification of suitable normalizing genes for quantitative real-time RT-PCR analysis of gene expression in fetal mouse gonads. *Sex. Dev.* **3**, 194-204.

**Zhao, L., Ng, E. T., Davidson, T.-L., Longmuss, E., Urschitz, J., Elston, M., Moisyadi, S., Bowles, J. and Koopman, P.** (2014). Structure–function analysis of mouse Sry reveals dual essential roles of the C-terminal polyglutamine tract in sex determination. *Proc. Natl. Acad. Sci. USA* **111**, 11768-11773.
